# Supplementary material for: A highly sensitive persulfate sensor based on a hybrid nanocomposite with silicomolybdate doping poly(3,4-ethylenedioxythiophene) on multi-walled carbon nanotubes
Source: Royal Society of Chemistry journal article supplement (doi:10.1039/c5ra09009a), 2015-01-01
Supplement: c5ra09009a1.pdf [file c5ra09009a1.pdf]

## Supplementary Information

### **A highly sensitive persulfate sensor based on hybrid nanocomposite with silicomolybdate doping poly(3,4-ethylenedioxythiophene) on multi-walled carbon nanotubes**

Kuo Chiang Lin, Tsung Han Wu and Shen Ming Chen\*

Electroanalysis and Bioelectrochemistry Lab, Department of Chemical Engineering and Biotechnology, National Taipei University of Technology, No.1, Section 3, Chung-Hsiao East Road, Taipei 106, Taiwan.

†Electronic Supplementary Information (ESI) available: [details of any supplementary information available should be included here]. See DOI: 10.1039/b000000x/

## Figures

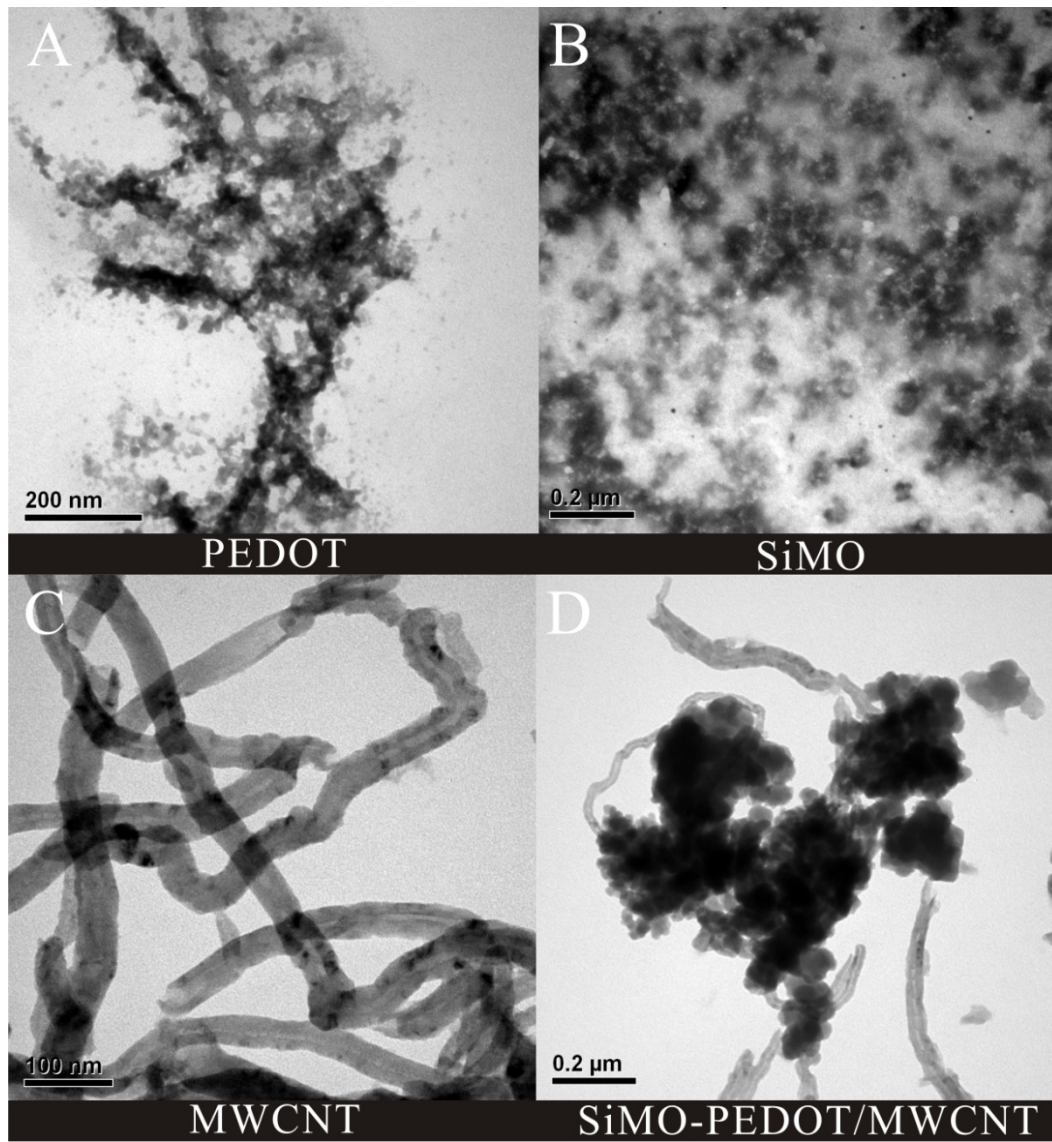

**Fig. S1** TEM images of (A) PEDOT, (B) SiMO, (C) MWCNT, and (D) SiMO-PEDOT/MWCNT coated Cu-net (300 mesh regular grid).

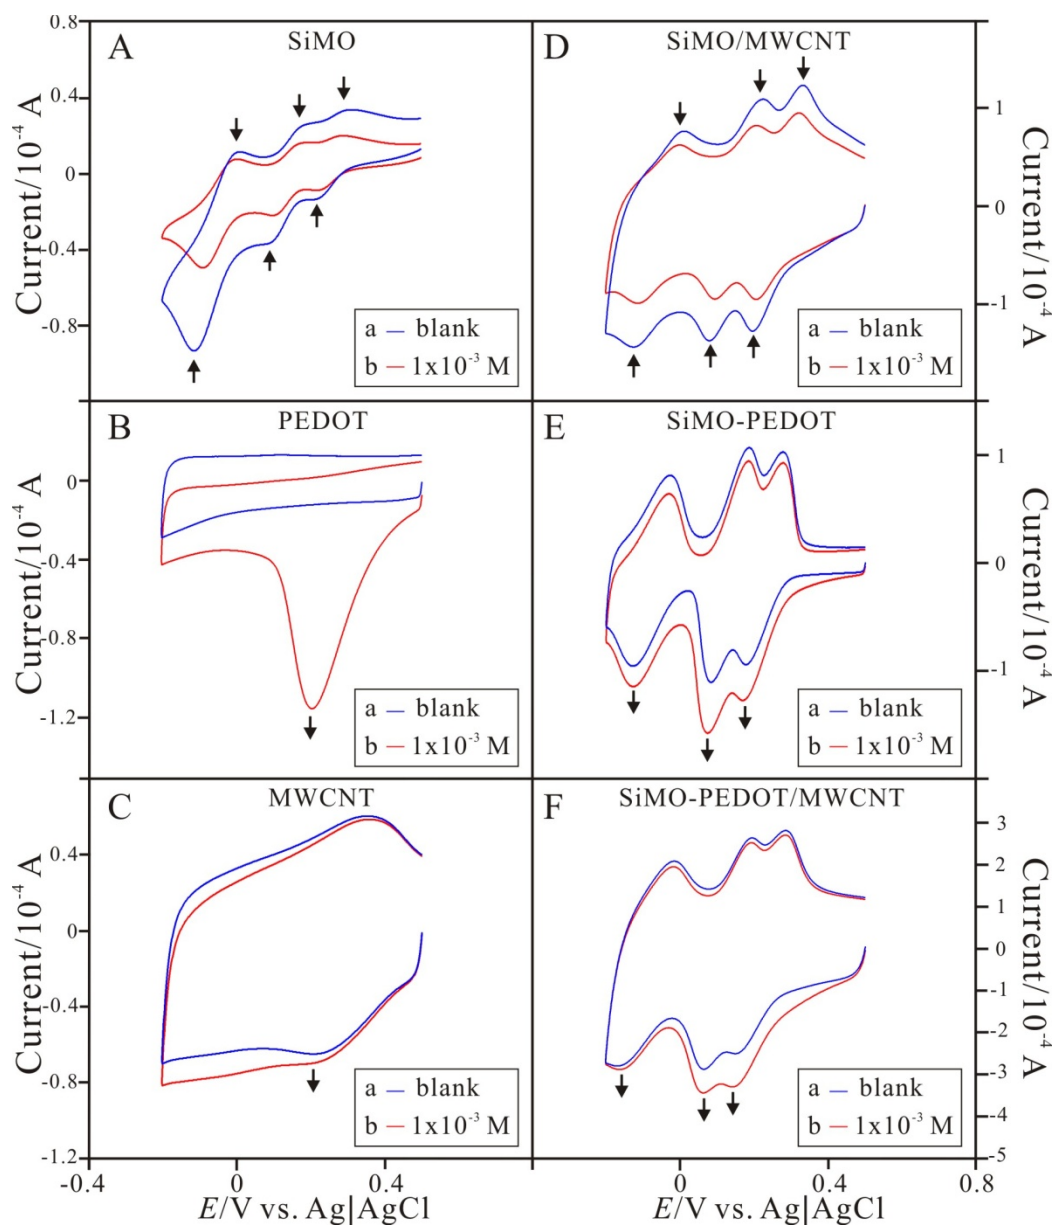

**Fig. S2** Cyclic voltammograms of (A) SiMO, (B) PEDOT, (C) MWCNT, (D) SiMO/MWCNT, (E) SiMO-PEDOT, and (F) SiMO-PEDOT/MWCNT modified GCEs examined in sulphuric solution (pH 1.5) containing  $[Na_2S_2O_8] =$  (a) blank and (b)  $1 \times 10^{-3}$  M, respectively. Scan rate =  $0.1 \text{ Vs}^{-1}$ .

## Tables

**Table S1** The relative standard deviation estimated in five SiMO-PEDOT/MWCNT modified electrodes.

| Electrode | Added(mM) | Found <sup>a</sup> (mM) |
|-----------|-----------|-------------------------|
| 1         | 1         | 1.07                    |
| 2         | 1         | 0.99                    |
| 3         | 1         | 0.98                    |
| 4         | 1         | 1.06                    |
| 5         | 1         | 1.02                    |
| R.S.D.    |           | 3.9%                    |

<sup>a</sup> Estimated in three measurements.

**Table S2** The relative standard deviation estimated in ten measurements of  $S_2O_8^{2-}$  at one SiMO-PEDOT/MWCNT electrode.

| No.    | Added(mM) | Found(mM) |
|--------|-----------|-----------|
| 1      | 1         | 1.08      |
| 2      | 1         | 1.06      |
| 3      | 1         | 1.05      |
| 4      | 1         | 1.03      |
| 5      | 1         | 0.99      |
| 6      | 1         | 0.99      |
| 7      | 1         | 0.98      |
| 8      | 1         | 0.97      |
| 9      | 1         | 0.97      |
| 10     | 1         | 0.96      |
| R.S.D. |           | 4.3%      |
